# Supplementary material for: Kindlin-2 modulates MafA and β-catenin expression to regulate β-cell function and mass in mice
Source: PubMed Central journal article supplement (PMC6981167; doi:10.1038/s41467-019-14186-y), 2020-01-24
Supplement: 41467_2019_14186_MOESM1_ESM.pdf [file 41467_2019_14186_MOESM1_ESM.pdf]

## **Supplementary Information**

**Kindlin-2 modulates MafA and  $\beta$ -catenin expression to regulate  $\beta$ -cell function and mass in mice (NCOMMS-18-01626E)**

**Zhu et al**

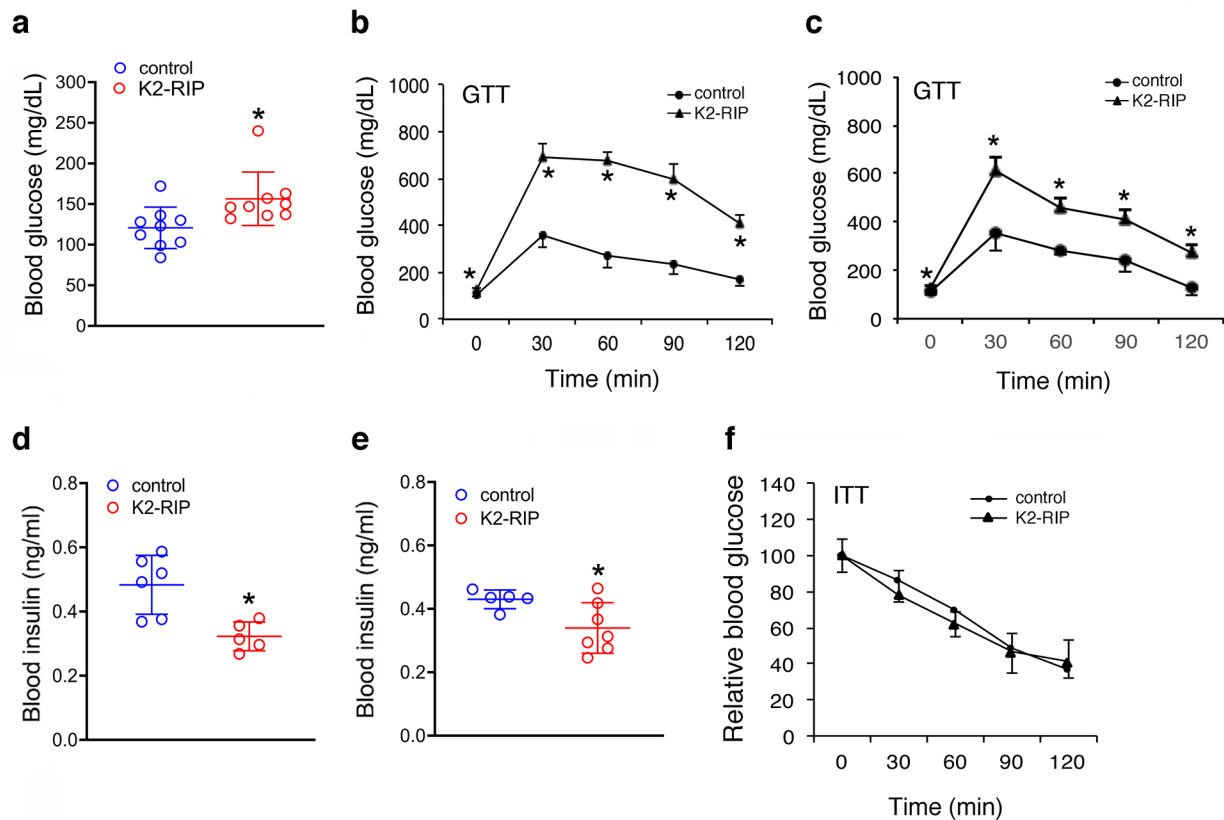

Supplementary Figure 1. Deletion of  $\beta$ -cell Kindlin-2 leads to glucose intolerance. (a) Fasting blood glucose level. Four-mo-old RIP-Cre (control) and K2-RIP male mice were fasted overnight and tail blood glucose levels were measured. \* $P < 0.05$ ,  $N = 9$  mice per genotype, Student's t-test. Results are expressed as mean  $\pm$  standard deviation (s.d.). (b) Glucose tolerance test (GTT). Four-mo-old control and K2-RIP male mice were fasted overnight, followed by performance of GTT assays. \* $P < 0.05$ ,  $N = 10$  mice per genotype, Student's t-test. Results are expressed as mean  $\pm$  s.d. (c) Two-mo-old control and K2-RIP female mice were subjected to GTT as in (b). \* $P < 0.05$ ,  $N = 8$  mice per group, Student's t-test. Results are expressed as mean  $\pm$  s.d. (d) Fasting blood insulin level. Two-mo-old control and K2-RIP female mice were fasted 6-7 h and tail blood insulin levels were measured by enzyme-linked immunosorbent assay (ELISA). \* $P < 0.05$ , versus control,  $N = 6$  for control,  $N = 5$  mice K2-RIP, Student's t-test. Results are expressed as mean  $\pm$  s.d. (e) Four-mo-old control and K2-RIP male mice were fasted 6-7h. Blood insulin levels were measured by ELISA. \*  $P < 0.05$ ,  $N = 5$  for control,  $N = 7$  mice K2-RIP, Student's t-test. Results are expressed as mean  $\pm$  s.d. (f) Insulin tolerance test (ITT). Four-mo-old control and K2-RIP male mice were fasted overnight, followed by performance of ITT assays.  $N = 6$  mice per genotype. Results are expressed as mean  $\pm$  s.d. Source data for Supplementary Figure 1a-f are provided as a Source Data file.

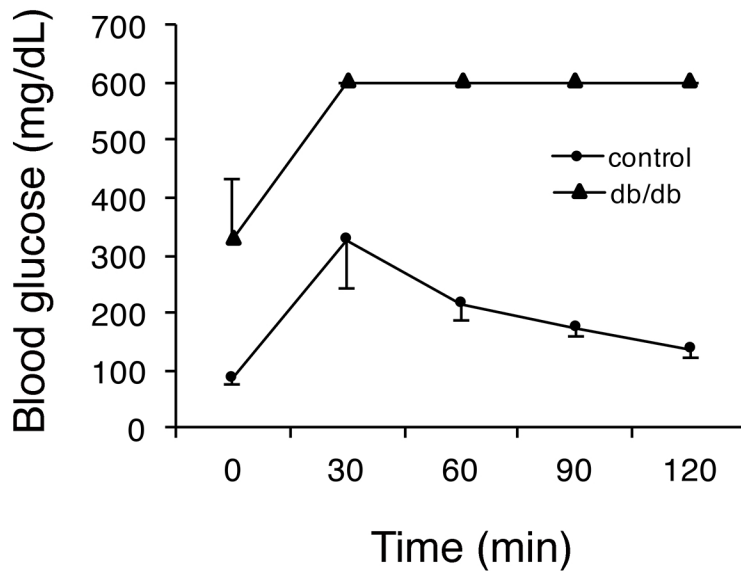

Supplementary Figure 2. Increased fasting glucose level and abnormal GTT in db/db mice. Three-month-old control and db/db male mice were fasted overnight and given a single intraperitoneal (i.p.) injection of glucose (2 g/kg body weight), followed by measurement of blood glucose levels at 0, 30, 60, 90, and 120 min after glucose injection. \* $P < 0.05$ ,  $N = 10$  mice for both control and db/db mice, Student's t-test. Results are expressed as mean  $\pm$  s.d. Please note: when we plotted this figure, we set the blood glucose levels of db/db mice at 30, 60, 90, and 120 min as 600 mg/dl since the blood glucose levels of db/db mice at those time points were so high that exceeded the meter limit (i.e., 600 mg/dl). Source data for Supplementary Figure 2 are provided as a Source Data file.

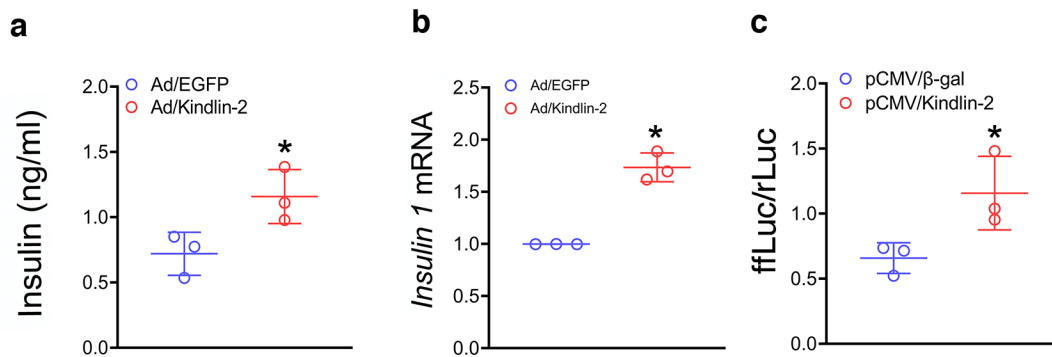

Supplementary Figure 3. Overexpression of Kindlin-2 activates insulin expression in INS-1 cells in vitro. (a,b) INS-1 cells were infected with equal amounts of adenoviral vectors for enhanced green fluorescent protein (Ad/EGFP) or Ad/Kindlin-2, followed by measurement of insulin protein levels in the culture media by ELISA (a) or qPCR analyses (b) for Insulin mRNA expression, which was normalized to Gapdh mRNA level. \*P < 0.05, versus Ad/EGFP, Results are expressed as mean ± standard deviation (s.d.). Statistical analyses (Student's t-test) were performed using the average values of triplicates from three independent experiments. (c) INS-1 cells were co-transfected with p460rINS1-luc, pRL-SV40 (for normalization), and the indicated amounts of pCMV/Kindlin-2 or pCMV/β-gal, followed by dual-luciferase assays. The amount of plasmid DNA was balanced as necessary with pCMV/β-gal such that the total DNA was constant for each group. \*P < 0.05, versus pCMV/β-gal. Results are expressed as mean ± s.d. Statistical analyses (Student's t-test) were performed using the average values of triplicates from three independent experiments. Source data for Supplementary Figure 3a-c are provided as a Source Data file.



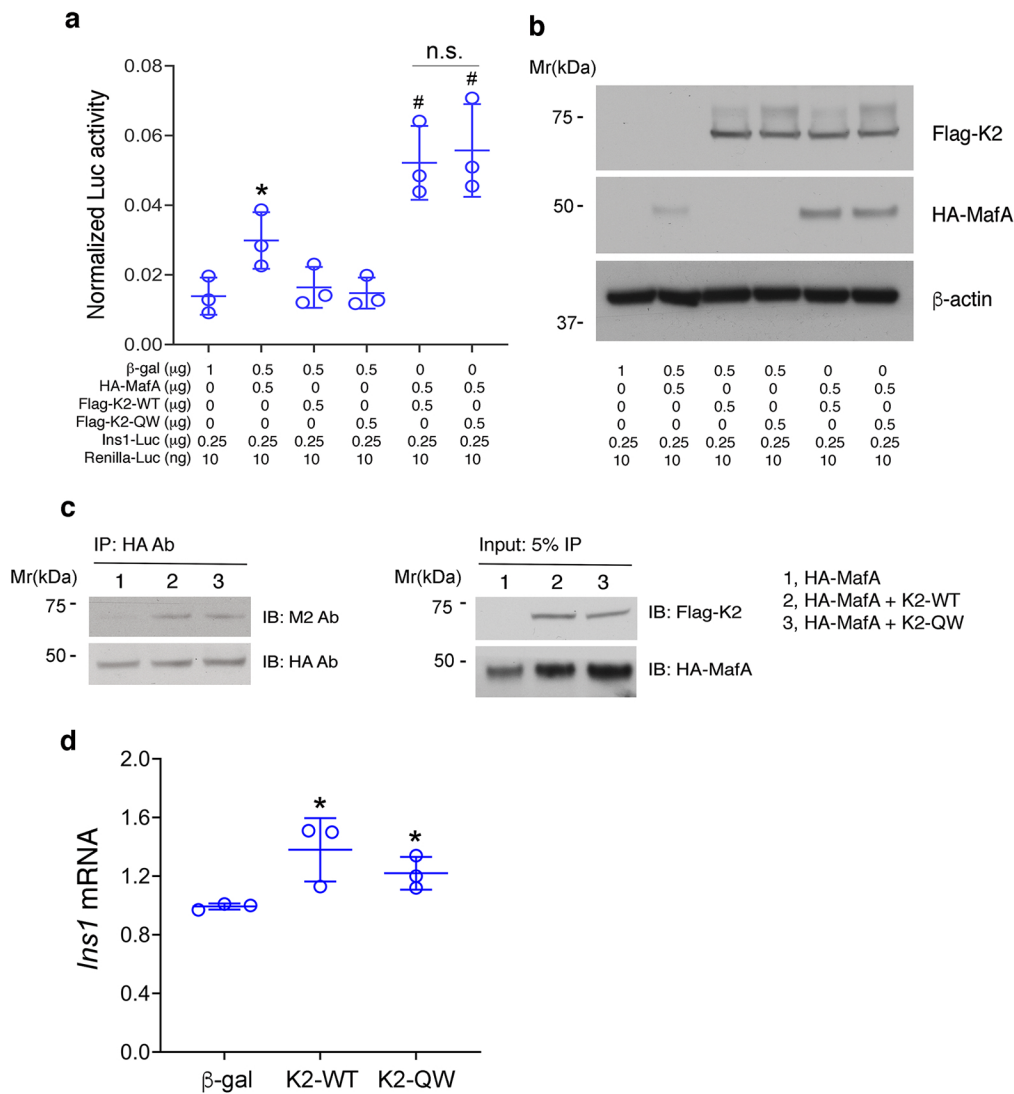

Supplementary Figure 4. Kindlin-2 interacts with and upregulates MafA and activates insulin expression independent of integrin activation. (a,b) COS-7 cells were co-transfected with p460rINS1-luc, pRL-SV40 (for normalization), and the indicated amounts of pCMV/HA-MafA, wild-type pCMV/Flag-Kindlin-2 (K2-WT) and an integrin-binding defective pCMV/Flag-Kindlin-2 (K2-QW), followed by dual-luciferase assays (a) or western blotting (b). The amount of plasmid DNA was balanced as necessary with pCMV/β-gal such that the total DNA was constant for each group. \* $P < 0.05$ , versus pCMV/β-gal, # $P < 0.05$ , versus pCMV/HA-MafA, Student's t-test. Results are expressed as mean  $\pm$  standard deviation (s.d.). Statistical analyses (Student's t-test) were performed using the average values of triplicates from three independent experiments. (c) Immunoprecipitation (IP) assay. Whole cell extracts from COS-7 cells overexpressing HA-MafA and wild-type Flag-Kindlin-2 (K2-WT) or an integrin-binding defective pCMV/Flag-Kindlin-2 (K2-QW) were immunoprecipitated with human influenza hemagglutinin (HA) antibody followed by western blot analysis using M2 (top) or HA (bottom) antibody. (d) INS-1 cells were transfected with equal amounts of pCMV/β-gal, wild-type pCMV/Flag-Kindlin-2 (K2-WT) and an integrin-binding defective pCMV/Flag-Kindlin-2 (K2-QW), followed by qPCR analyses for Insulin mRNA expression, which was normalized to Gapdh mRNA level. \* $P < 0.05$ , versus pCMV/β-gal. Results are expressed as mean  $\pm$  s.d. Statistical analyses (Student's t-test) were performed using the average values of triplicates from three independent experiments. Source data for Supplementary Figure 4a-d are provided as a Source Data file.

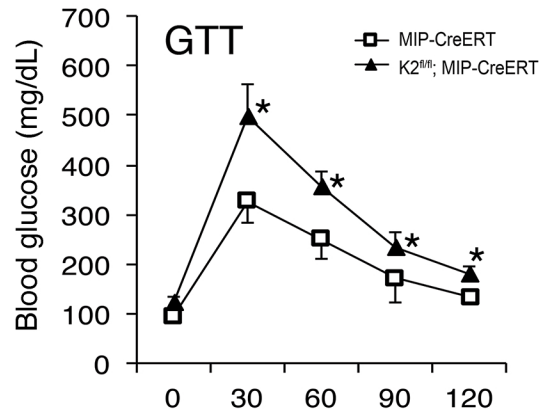

Supplementary Figure 5. Inducible deletion of Kindlin-2 in adult  $\beta$  cells causes glucose intolerance in female mice. Glucose tolerance test (GTT). Three-month-old K2<sup>fl/fl</sup>; MIPCreERT and control female mice were treated with tamoxifen (TM) as described in Methods. After 30 d after injection, mice were fasted overnight, followed by performance of GTT assays. \*P < 0.05, versus control, N = 4 mice for control, N = 7 mice for K2<sup>fl/fl</sup>; MIPCreERT, Student's t-test. Results are expressed as mean  $\pm$  standard deviation (s.d.). Source data for Supplementary Figure 5 are provided as a Source Data file.

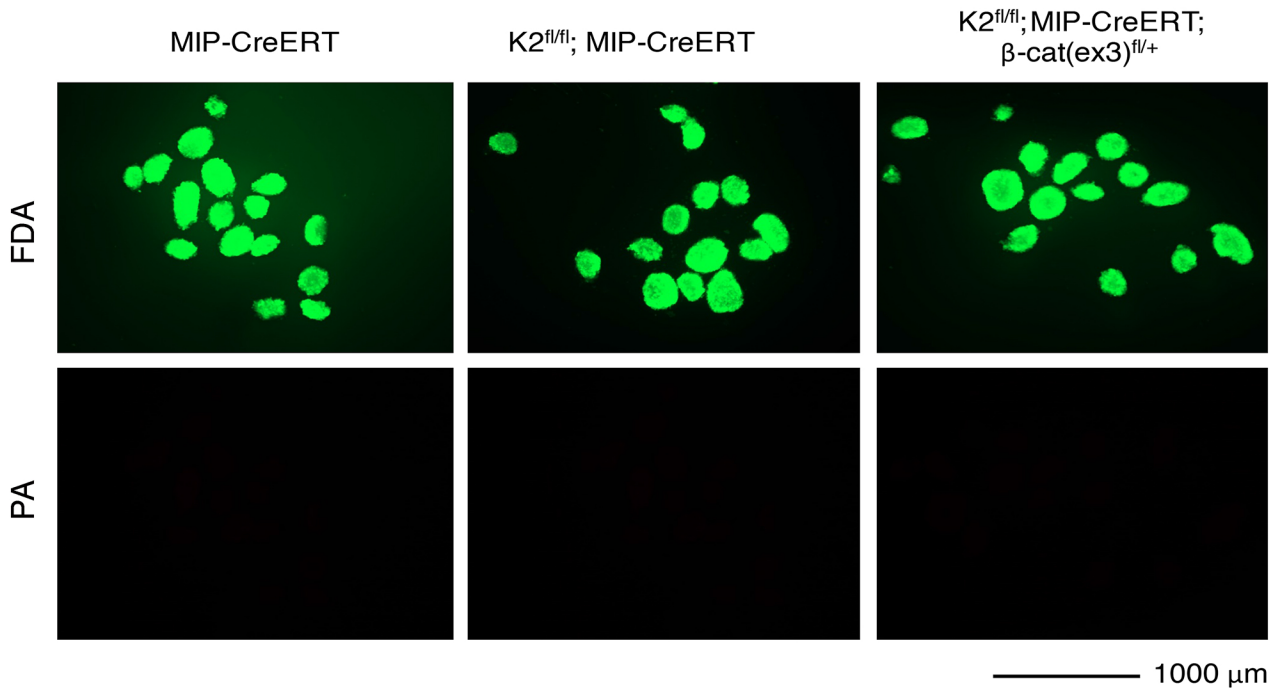

Supplementary Figure 6. Pancreatic islet cell viability. Primary pancreatic islets from MIP-CreERT, K2<sup>fl/fl</sup>; MIP-CreERT, and K2<sup>fl/fl</sup>; MIP-CreERT;  $\beta$ -cat(ex3)<sup>fl/+</sup> mice were stained with fluorescein diacetate (FDA) for live cells (green) or propidium iodide (PI) for dead cells (red). Source data for Supplementary Figure 6 are provided as a Source Data file.

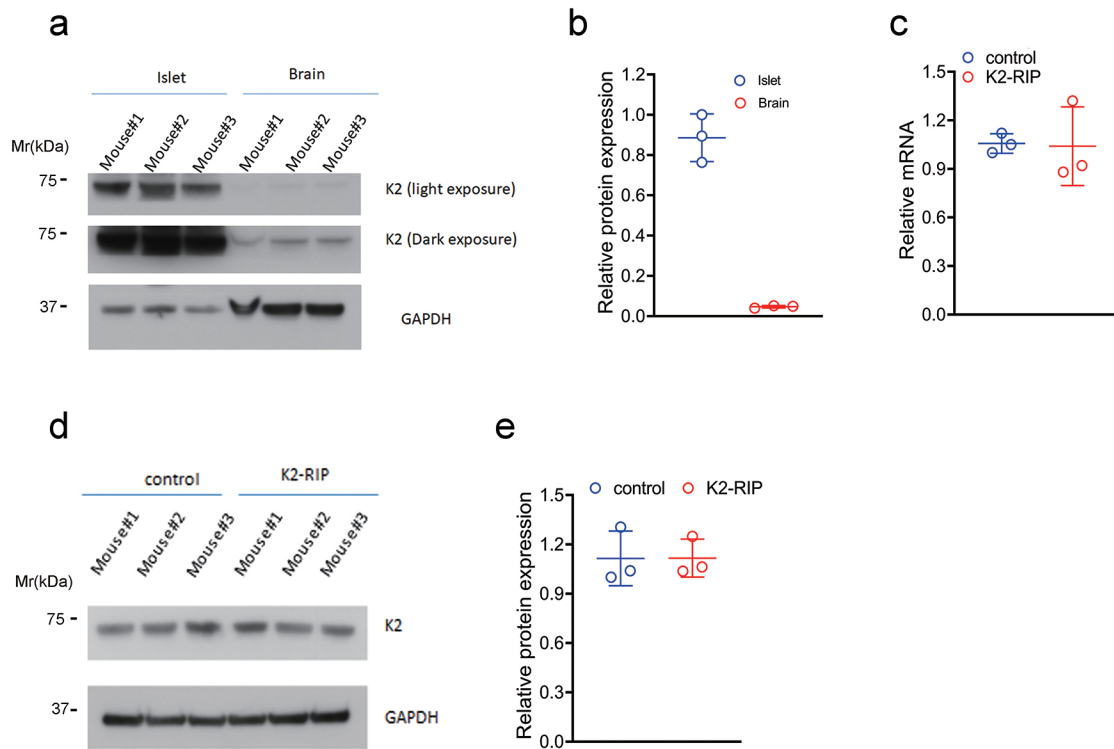

Supplementary Figure 7. Kindlin-2 expression is not reduced in K2-RIP brain. (a) Western blotting. Protein extracts isolated from primary pancreatic islets or the brains of 1-mo-old normal C57BL/6 male mice were subjected to western blotting for Kindlin-2 expression. Gapdh was used as a loading control. Quantitative data (b). Student's t-test was performed. N = 3 mice per group. Results are expressed as mean  $\pm$  s.d. (c) Quantitative real-time reverse transcriptase-polymerase chain reaction (qPCR) analyses. Total RNAs isolated from 2-mo-old male K2-RIP mice or control (RIP-Cre) brains were subjected to qPCR analyses for Kindlin-2 expression. Kindlin-2 mRNA was normalized to Gapdh mRNA. Student's t-test was performed using the average values of triplicates. N = 3 mice per group. (d,e) Western blotting. Protein extracts isolated from 2-mo-old male K2-RIP mice or control (RIP-Cre) brains were subjected to western blotting for Kindlin-2 expression. Gapdh was used as a loading control. Quantitative data (e). Student's t-test was performed. N = 3 mice per group. Results are expressed as mean  $\pm$  s.d. Source data for Supplementary Figure 7 are provided as a Source Data file.

**Supplementary Table 1: Mouse qPCR primers**

| Name      | 5' primer               | 3' primer               |
|-----------|-------------------------|-------------------------|
| Gapdh     | CAGTGCCAGCCTCGTCCCCTAGA | CTGCAAATGGCAGCCCTGGTGAC |
| Insulin 1 | GCAAGCAGGTCATTGTTTCAAC  | AAGCCTGGGTGGGTTTGG      |
| Kindlin-2 | TGGACGGGATAAGGATGCCA    | TGACATCGAGTTTTTCCACCAAC |
| MafA      | GCTTCAGCAAGGAGGAGGTC    | TCTCGCTCTCCAGAATGTGC    |

**Supplementary Table 2: Rat qPCR primers**

| Name      | 5' primer                     | 3' primer              |
|-----------|-------------------------------|------------------------|
| GAPDH     | CCTTCCGTGTTCTACCCCAAT         | GCCAGGATGCCCTTTAGTGG   |
| INSULIN 1 | ACACCCAAGTCCCGTCGTGAAGTG<br>G | GGCGGGGAGTGGTGGACTCAGT |

**Supplementary Table 3: Antibodies information**

| Antibody                 | Company    | Catalog # | Application/Dilution                 |
|--------------------------|------------|-----------|--------------------------------------|
| $\beta$ -Actin           | Sigma      | A2228     | WB (1:10000)                         |
| Active- $\beta$ -catenin | Millipore  | 05-665    | WB (1:1000)                          |
| $\beta$ -Catenin         | CST        | 9562      | WB (1:1000)                          |
| Glucagon                 | CST        | 2760      | IF (1:100)                           |
| Gapdh                    | Santa Cruz | Sc-32233  | WB(1:5000)                           |
| Glucagon                 | Sigma      | G2654     | IF (1:50)                            |
| Gsk-3 $\beta$            | Santa Cruz | sc-9166   | IHC (1:100), WB (1:1000)             |
| p-Gsk-3 $\beta$ (Ser9)   | Santa Cruz | sc-11757  | IHC (1:100), WB (1:1000)             |
| Insulin                  | Abcam      | ab7842    | IHC (1:600), IF (1:200)              |
| Ki67                     | Abcam      | ab15580   | IF (1:100)                           |
| Kindlin-2                | Abcam      | Ab74030   | WB (1:1000), IHC (1:2000), IF (1:50) |
| MafA                     | Bethyl     | IHC-00352 | IHC (1:500)                          |
| MafA                     | Bethyl     | A300-611A | WB (1:1000)                          |
| Pdx1                     | Abcam      | Ab47267   | IHC (1:1000)                         |
| $\alpha$ -Tubulin        | Sigma      | T9026     | WB (1:5000)                          |
